# Supplementary material for: Synergistic Effect of Dietary Betaines on SIRT1-Mediated Apoptosis in Human Oral Squamous Cell Carcinoma Cal 27
Source: MDPI journal article supplement (doi:10.3390/cancers12092468), 2020-08-31
Supplement: s1 [file s1]

# Synergistic Effect of Dietary Betaines on SIRT1-Mediated Apoptosis in Human Oral Squamous Cell Carcinoma Cal 27

Nunzia D'Onofrio<sup>1</sup>, Luigi Mele<sup>2</sup>, Elisa Martino<sup>1</sup>, Angela Salzano<sup>3</sup>, Brunella Restucci<sup>3</sup>, Domenico Cautela<sup>4</sup>, Marco Tatullo<sup>5</sup>, Maria Luisa Balestrieri<sup>1\*</sup>, Giuseppe Campanile<sup>3</sup>

## Supplementary Figures

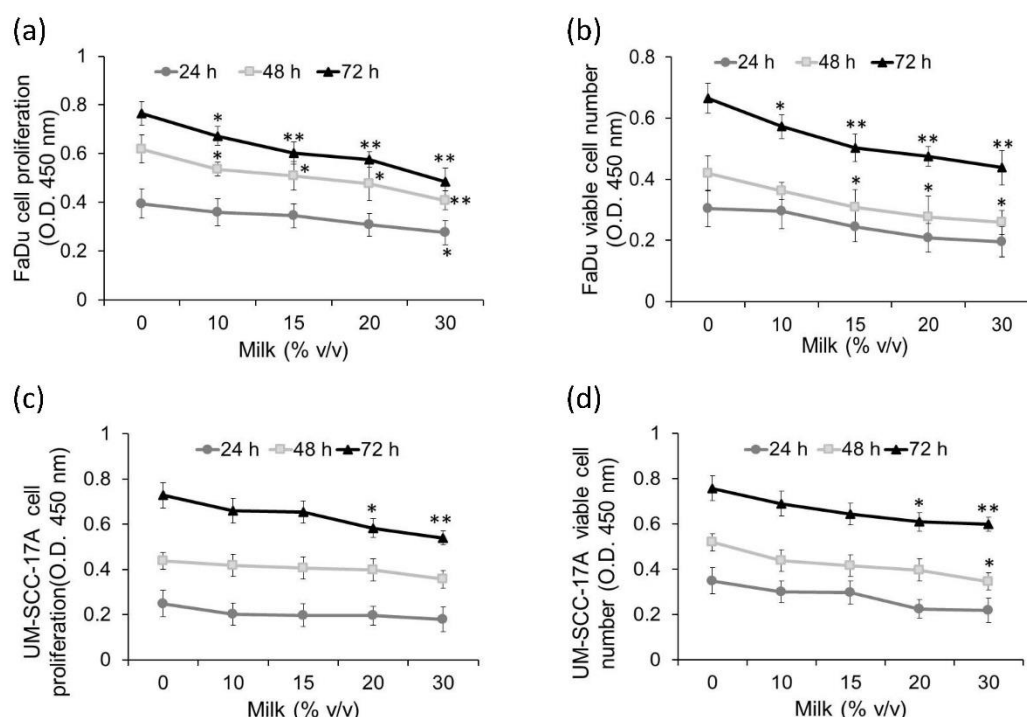

**Supplementary Fig.1 Milk effect on oral cancer cell viability and proliferation.** Cell viability and proliferation assessed by Cell Counting Kit-8 in (a, b) FaDu and (c, d) UM-SCC-17A cells treated for 24, 48 and 72 h with increasing volumes of milk (up to 30% v/v). Milk was centrifuged at 3,000 x g for 15 min at 4°C to remove fat globules. Skimmed milk was then filtered through a 5 µm Millipore filter followed by filtration through an Amicon Ultra 0.5 mL centrifugal filter with a 3-kDa molecular weight cut-off. Before being used, milk extracts were filtered through 0.22 µm Millipore filters. Values represent the mean±SD of three independent experiments. \*P<0.05 vs Ctr, \*\*P<0.01 vs Ctr.

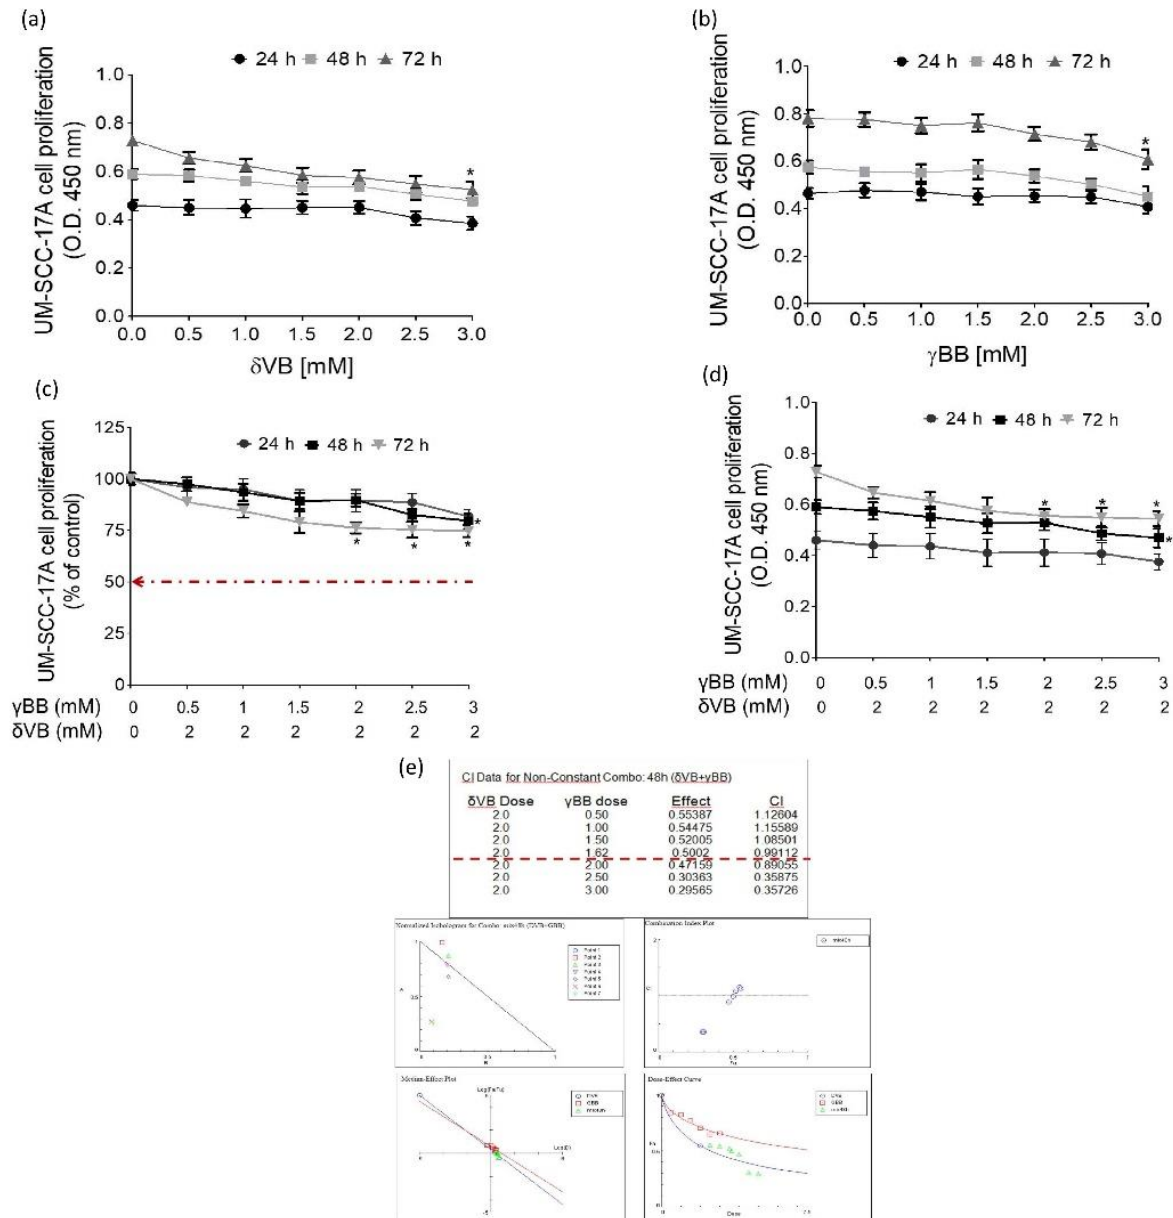

**Supplementary Fig.2. Inhibition of UM-SCC-17A cell proliferation.** Different concentrations (up to 3 mM) of  $\delta VB$  or  $\gamma BB$  were used to treat (a, b) UM-SCC-17A cells for 24, 48 and 72h. (c, d) Cell proliferation was assessed after treatment with  $\delta VB$  (2 mM) plus serial concentrations of  $\gamma BB$  (0.5, 1, 1.5, 2, 2.5, 3 mM). Control cells were grown in medium containing the same volume (% v/v) of HBSS-10 mM Hepes. Cell proliferation inhibition was assessed using Cell Counting Kit-8 assay. (e) Combination index values and dot plots resulted by using serial concentrations of  $\gamma BB$  at  $\delta VB$  (2 mM). Values represent the mean $\pm$ SD of four independent experiments. \* $P$ <0.05 vs Ctr.

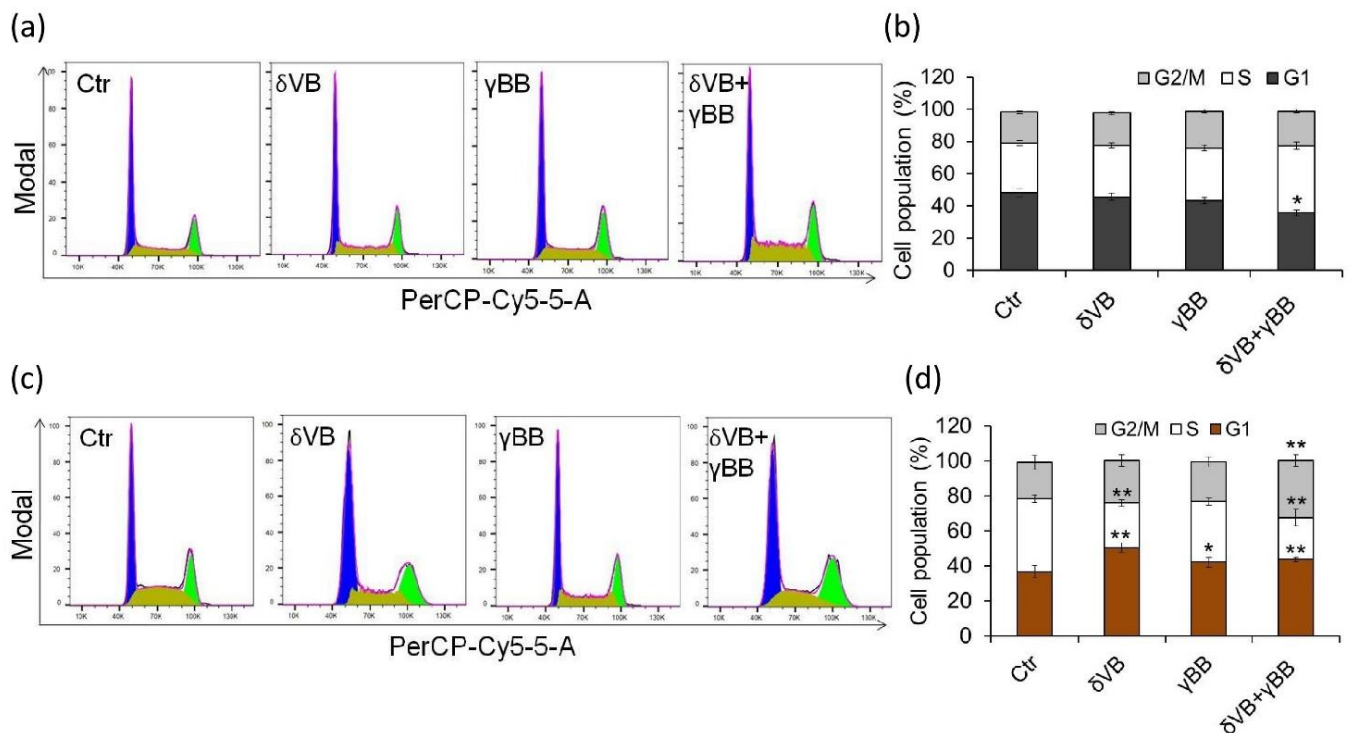

**Supplementary Fig.3. FaDu cell cycle analysis.** Cells were treated with vehicle (Ctrl), δVB (2 mM), γBB (2.5mM) or δVB+γBB for **(a, b)** 48 and **(c, d)** 72 h. Cell cycle distribution was assessed by flow cytometry collecting PI fluorescence as FL3-A (linear scale) and analysis by ModFIT software (Verity Software House, USA, Becton Dickinson). For each sample at least 10.000 events were analyzed. \* $P < 0.05$  vs Ctrl, \*\* $P < 0.01$  vs Ctrl.

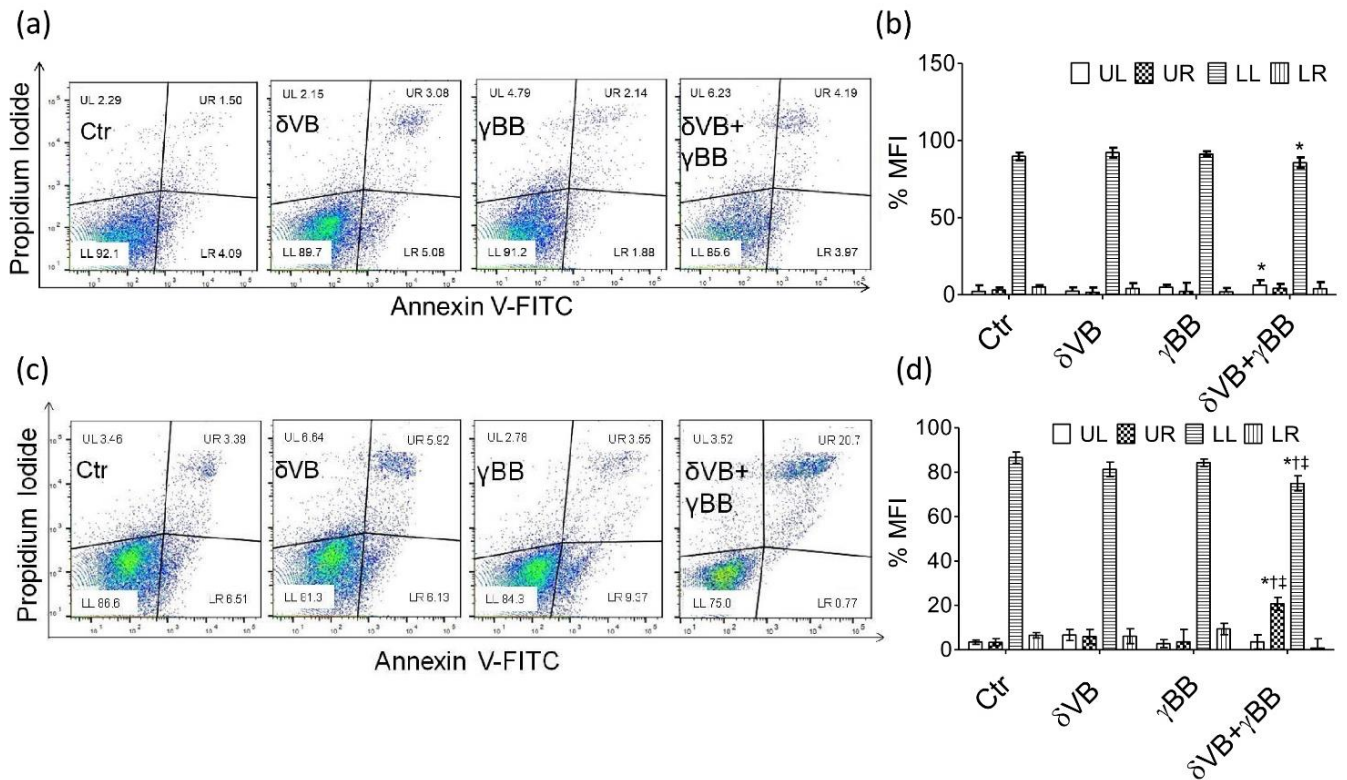

**Supplementary Fig. 4. FaDu apoptotic cell death.** Representative dot plots and analysis of annexin V-FITC and PI-stained cells analyzed after (a, b) 48 and (c, d) 72 h of treatment by flow cytometry. Data are expressed as mean $\pm$ SD of n=3 experiments. At least 10.000 events were acquired. \* $P$ <0.05 vs Ctr,  $^{\dagger}P$ <0.05 vs  $\delta$ VB,  $^{\ddagger}P$ <0.05 vs  $\gamma$ BB.

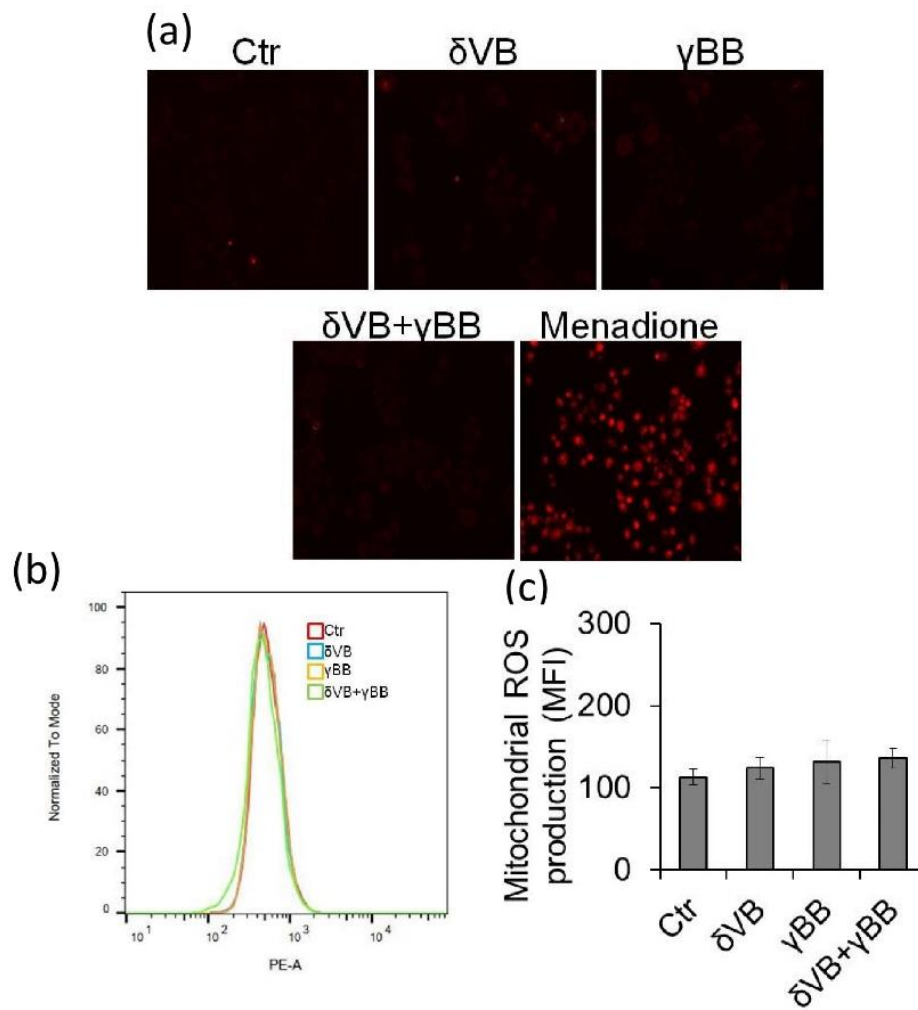

**Supplementary Fig. 5. Mitochondrial stress assessment in non-tumor cell line.** HaCaT cells were treated with vehicle (Ctr),  $\delta$ VB (2 mM),  $\gamma$ BB(2.5mM) or  $\delta$ VB+ $\gamma$ BB for 72 h in serum-free media. After MitoSOX staining, cells were analyzed by (a) fluorescence microscopy and (b, c) FACS analysis. Menadione is used as positive control.
